# Supplementary material
Source: MDPI journal article supplement (https://www.mdpi.com/2297-8739/10/5/295)
Supplement: s1 [file s1]

Supplementary File

# Development and Validation of Analytical Method using Gas Chromatography with Triple Quadrupole Mass Spectrometry for the Detection of Alkyl Halides as Potential Genotoxic Impurities in Posaconazole

Hari Naga Prasada Reddy Chittireddy <sup>1</sup>, J. V. Shanmukha Kumar <sup>1,\*</sup>, Anuradha Bhimireddy <sup>1</sup>, Mohammed Rafi Shaik <sup>2</sup>, Mujeeb Khan <sup>2</sup>, Merajuddin Khan <sup>2</sup>, Tae Hwan Oh <sup>3</sup> and Baji Shaik <sup>3,\*</sup>

<sup>1</sup> Department of Engineering Chemistry, College of Engineering, Koneru Lakshmaiah Education Foundation, Vaddeswaram, Guntur 522 502, Andhra Pradesh, India; prasadreddy19@gmail.com (H.N.P.R.C.)

<sup>2</sup> Department of Chemistry, College of Science, King Saud University, P.O. Box 2455, Riyadh 11451, Saudi Arabia

<sup>3</sup> School of Chemical Engineering, Yeungnam University, Gyeongsan 38541, Republic of Korea

\* Correspondence: shanmukh\_fed@kluniversity.in (J.V.S.K.); shaikbaji@yu.ac.kr (B.S.)

## 1-(2,4-difluorophenyl) ethan-1-one (PGI-1) Standard Qualification Data

| CERTIFICATE OF ANALYSIS                                                                                                                                                                                                           |                                    |                                                                    |
|-----------------------------------------------------------------------------------------------------------------------------------------------------------------------------------------------------------------------------------|------------------------------------|--------------------------------------------------------------------|
| Name of Product: 1-(2,4-difluorophenyl)ethan-1-one                                                                                                                                                                                |                                    |                                                                    |
| Molecular weight                                                                                                                                                                                                                  | : 156.13                           | Molecular Formula : C <sub>8</sub> H <sub>6</sub> F <sub>2</sub> O |
| Cat. No.                                                                                                                                                                                                                          | : NQ                               | CAS NO : 364-83-0                                                  |
| 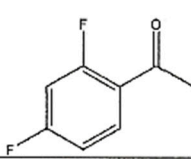                                                                                                                                               |                                    |                                                                    |
| Chemical Name: 1-(2,4-difluorophenyl) ethan-1-one                                                                                                                                                                                 |                                    |                                                                    |
| Sr. No.                                                                                                                                                                                                                           | Test                               | Result                                                             |
| 1                                                                                                                                                                                                                                 | Description                        | Pale yellow liquid                                                 |
| 3                                                                                                                                                                                                                                 | Chromatographic Purity by HPLC     | 99.93%                                                             |
| 4                                                                                                                                                                                                                                 | MASS by LCMS                       | Confirms to structure                                              |
| 5                                                                                                                                                                                                                                 | <sup>1</sup> H NMR                 | Confirm to structure                                               |
| 6                                                                                                                                                                                                                                 | <sup>13</sup> C NMR                | Confirm to structure                                               |
| 7                                                                                                                                                                                                                                 | FT-IR                              | Confirm to structure                                               |
| 8                                                                                                                                                                                                                                 | Loss on drying (LOD) by TGA (%W/W) | 0.23%                                                              |
| 9                                                                                                                                                                                                                                 | Potency (%W/W)                     | 99.7%                                                              |
| Conclusion: The product complies as per above specifications.                                                                                                                                                                     |                                    |                                                                    |
| <ul style="list-style-type: none"> <li>• Long term Storage Conditions: Store at 2 to 8° C</li> <li>• Transportation Storage Condition : Room temperature</li> <li>• Short Term storage condition : Ambient Temperature</li> </ul> |                                    |                                                                    |

Figure S1: 1-(2,4-difluorophenyl) ethan-1-one (PGI-1) standard certificate of analysis.

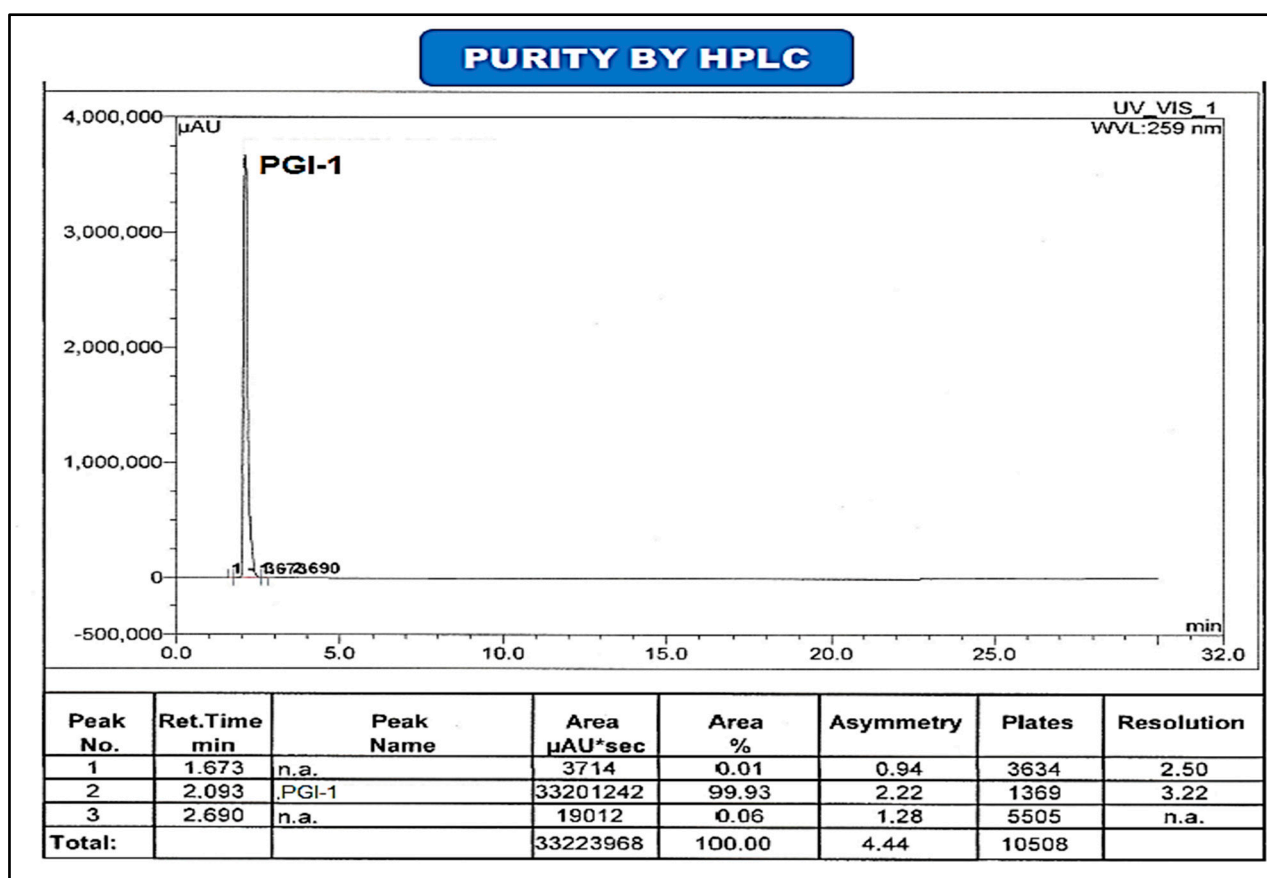

Figure S2: PGI-1 purity by HPLC chromatogram.

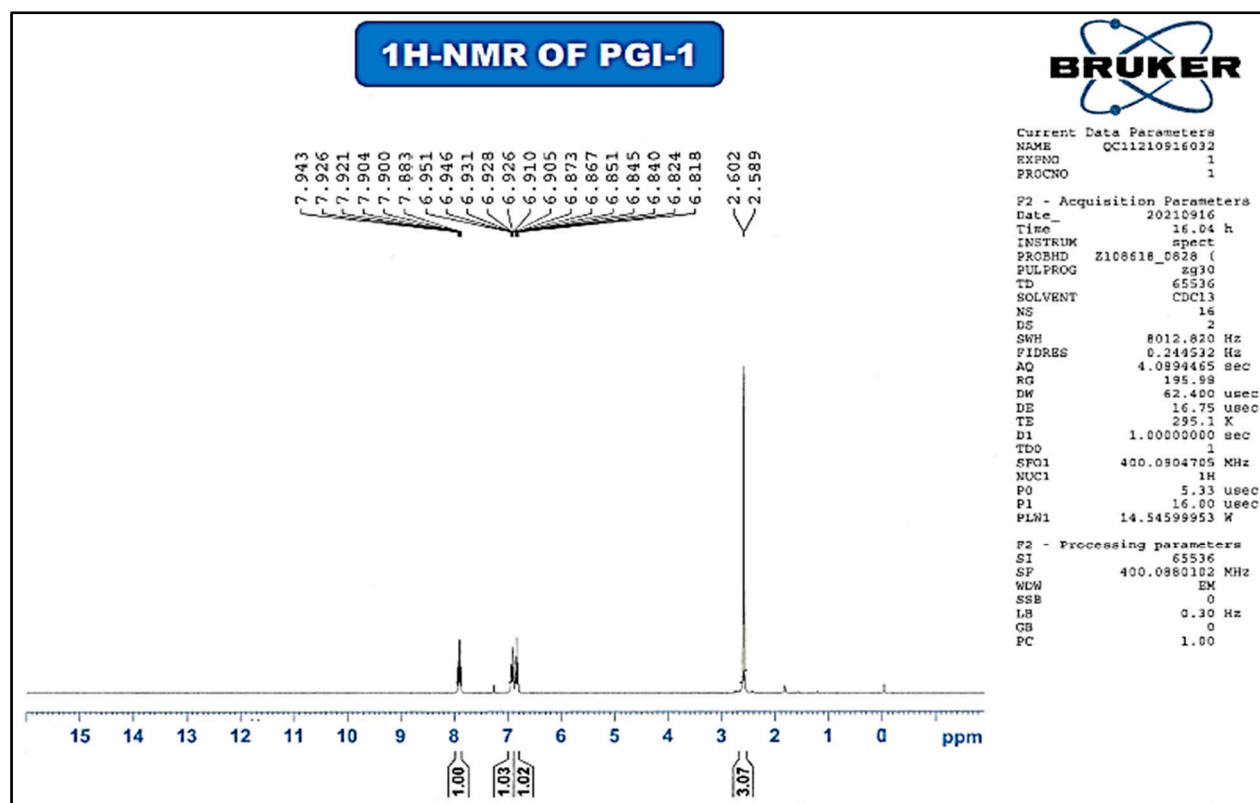

Figure S3: PGI-1 standard <sup>1</sup>H-NMR spectrum data.

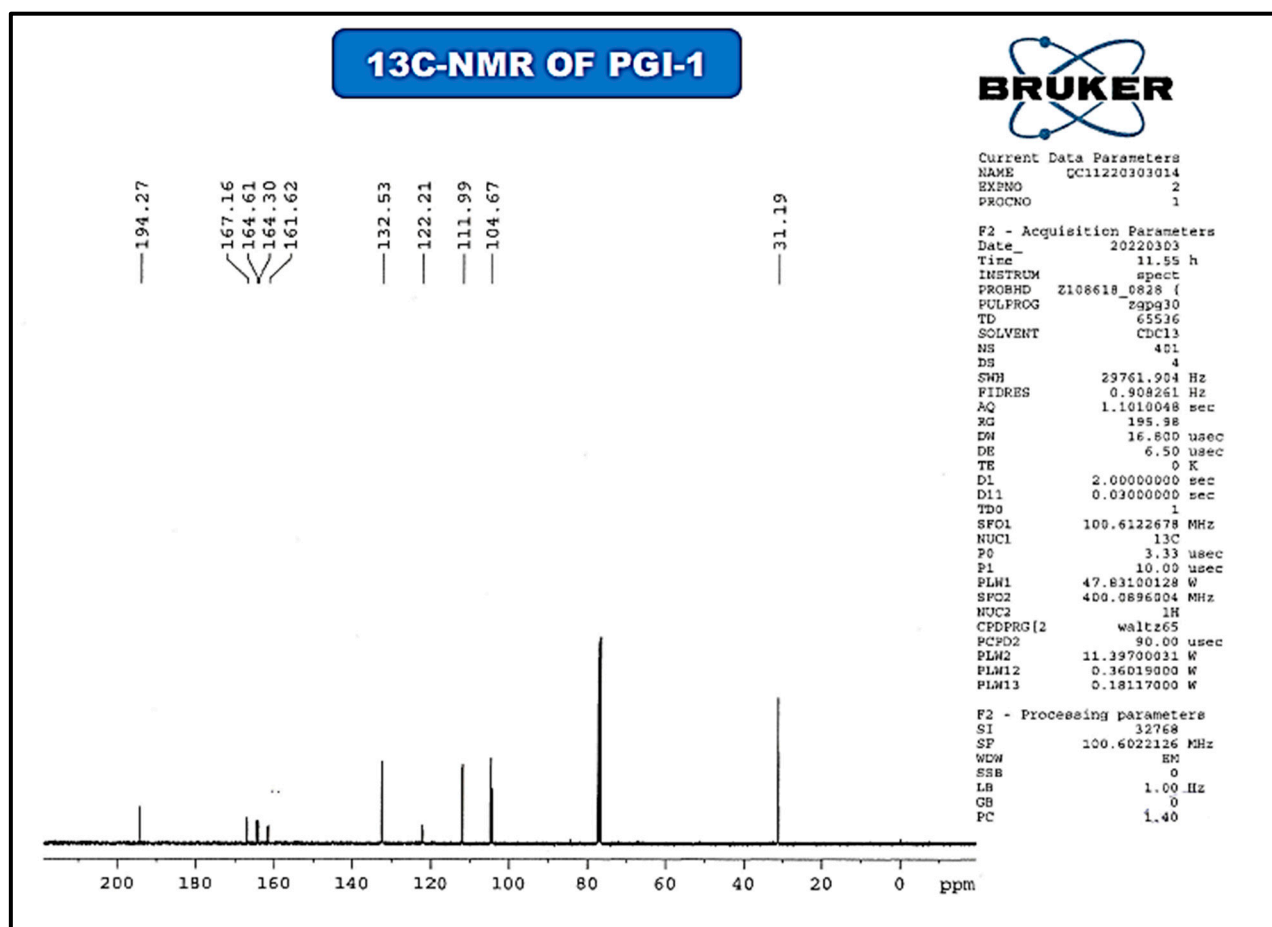

Figure S4: PGI-1 standard  $^{13}\text{C}$ -NMR spectrum data.

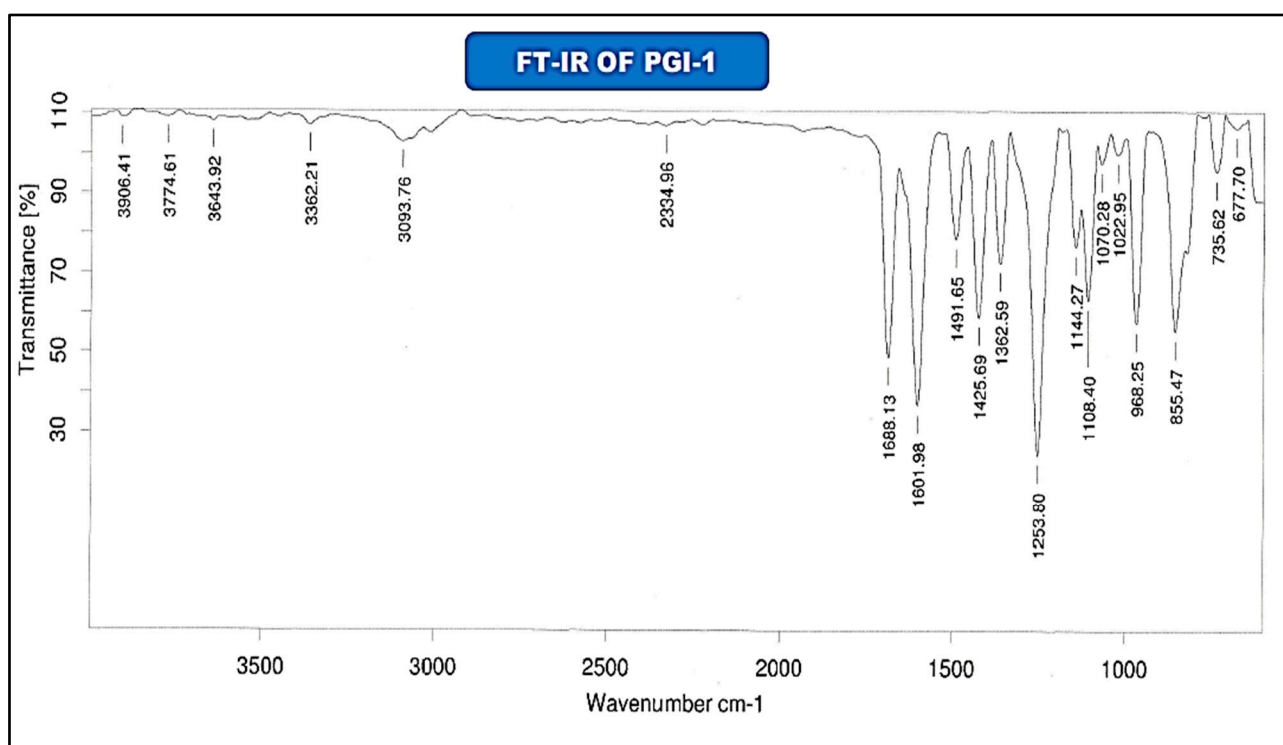

Figure S5: PGI-1 standard FT-IR spectrum.

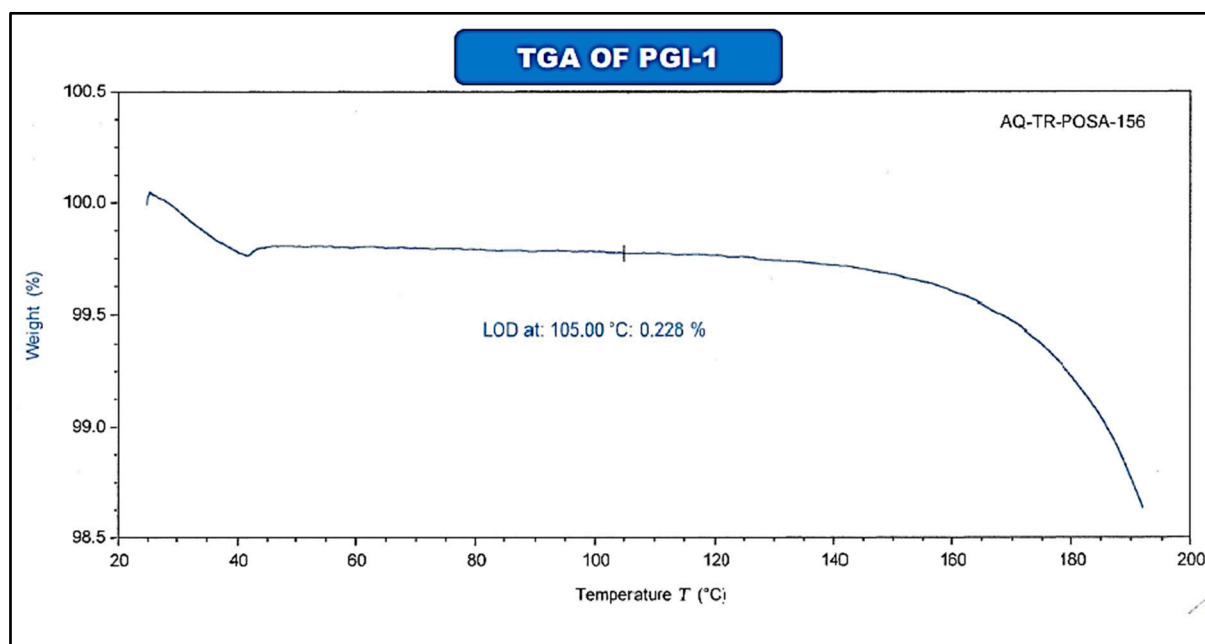

Figure S6: PGI-1 standard TGA graph.

### (Z)-1-(1-bromo prop-1-en-2-yl)- 2,4-difluorobenzene (PGI-2) Standard Qualification

#### CERTIFICATE OF ANALYSIS

| Name of Product: Z)-1-(1-bromoprop-1-en-2-yl)-2,4-difluorobenzene                                                                                                                                                                 |                                    |                                                                    |
|-----------------------------------------------------------------------------------------------------------------------------------------------------------------------------------------------------------------------------------|------------------------------------|--------------------------------------------------------------------|
| Molecular weight : 233.06                                                                                                                                                                                                         |                                    | Molecular Formula : C <sub>9</sub> H <sub>7</sub> BrF <sub>2</sub> |
| 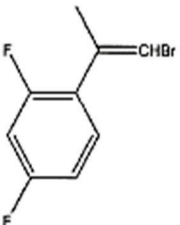                                                                                                                                               |                                    |                                                                    |
| ChemicalName: 1-(1-bromoprop-1-en-2-yl)-2,4-difluorobenzene                                                                                                                                                                       |                                    |                                                                    |
| Sr. No.                                                                                                                                                                                                                           | Test                               | Result                                                             |
| 1                                                                                                                                                                                                                                 | Description                        | Colourless Liquid                                                  |
| 3                                                                                                                                                                                                                                 | Chromatographic Purity by HPLC     | 99.12%                                                             |
| 4                                                                                                                                                                                                                                 | MASS by LCMS                       | No Ionization                                                      |
| 5                                                                                                                                                                                                                                 | <sup>1</sup> H NMR                 | Confirms to structure                                              |
| 6                                                                                                                                                                                                                                 | <sup>13</sup> C NMR                | Confirms to structure                                              |
| 7                                                                                                                                                                                                                                 | FT-IR                              | Confirms to structure                                              |
| 8                                                                                                                                                                                                                                 | Loss on drying (LOD) by TGA (%W/W) | 0.26%                                                              |
| 9                                                                                                                                                                                                                                 | Potency (%W/W)                     | 98.86%                                                             |
| Conclusion: The product complies as per above specifications.                                                                                                                                                                     |                                    |                                                                    |
| <ul style="list-style-type: none"> <li>• Long term Storage Conditions: Store at 2 to 8° C</li> <li>• Transportation Storage Condition : Room temperature</li> <li>• Short Term storage condition : Ambient Temperature</li> </ul> |                                    |                                                                    |

Figure S7: (Z)-1-(1-bromo prop-1-en-2-yl)- 2,4-difluorobenzene (PGI-2) standard certificate of analysis.

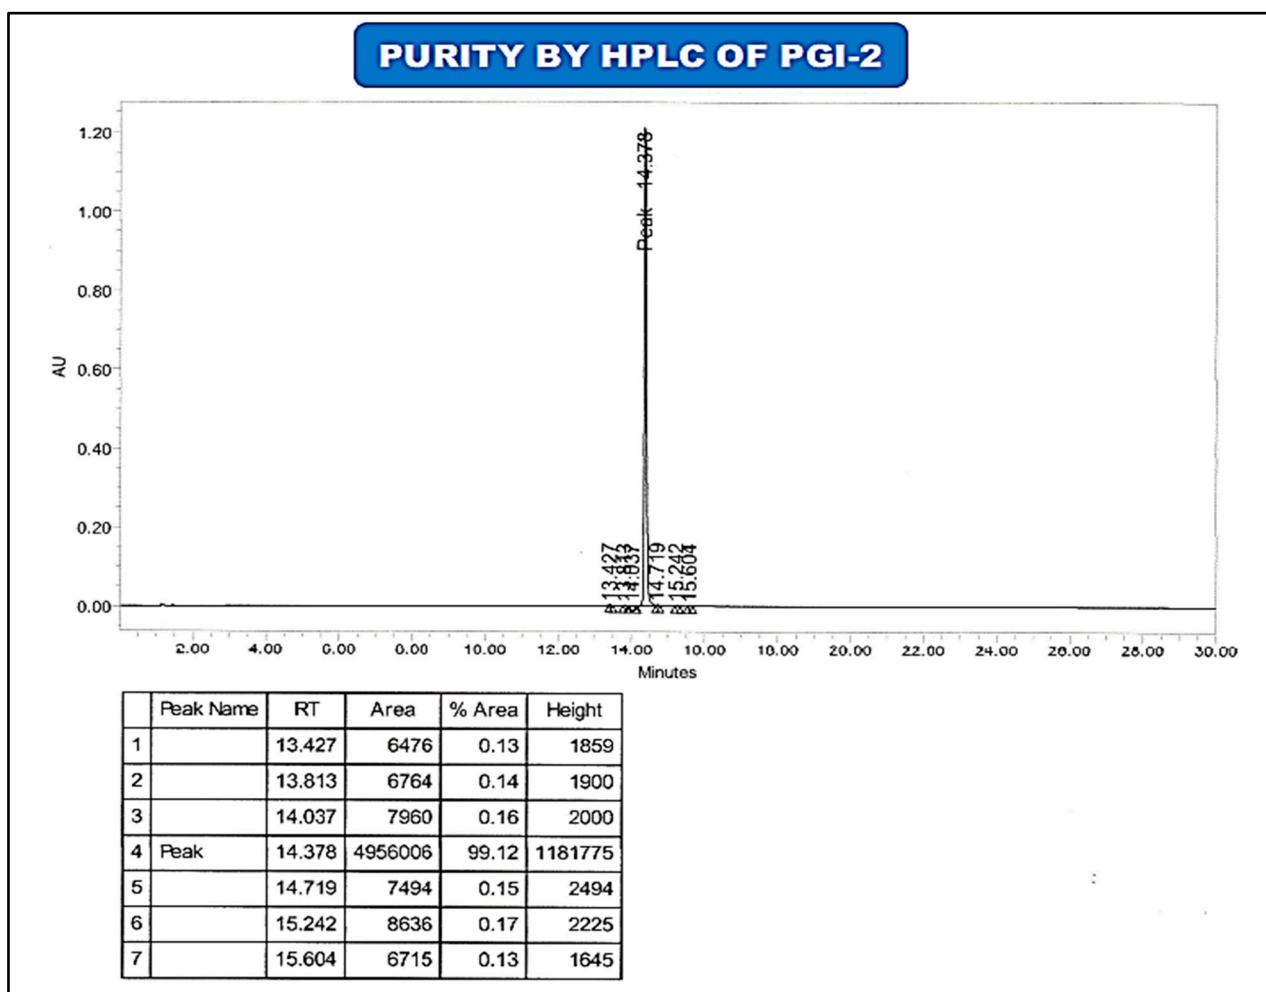

Figure S8: PGI-2 standard purity by HPLC chromatogram.

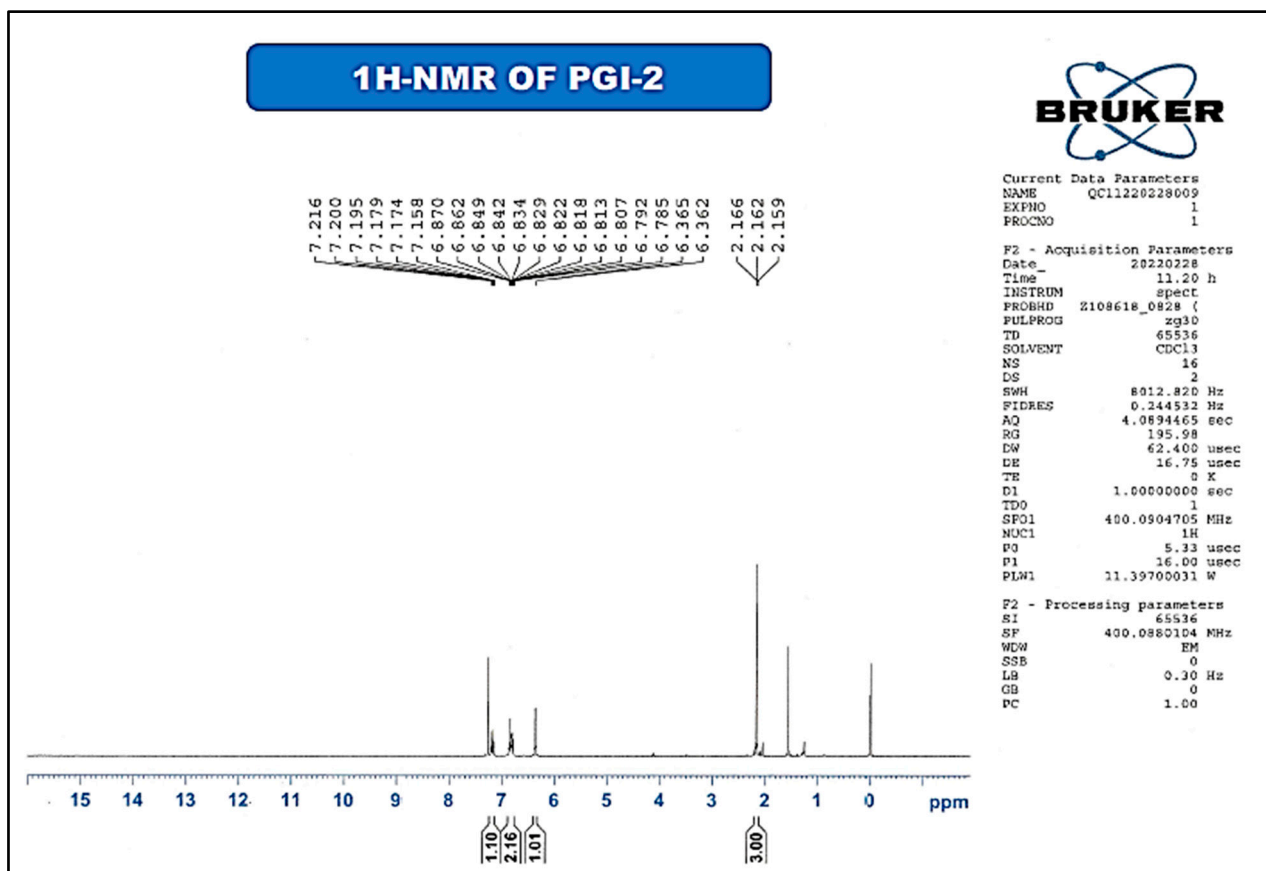

Figure S9: PGI-2 standard <sup>1</sup>H-NMR spectrum graph.

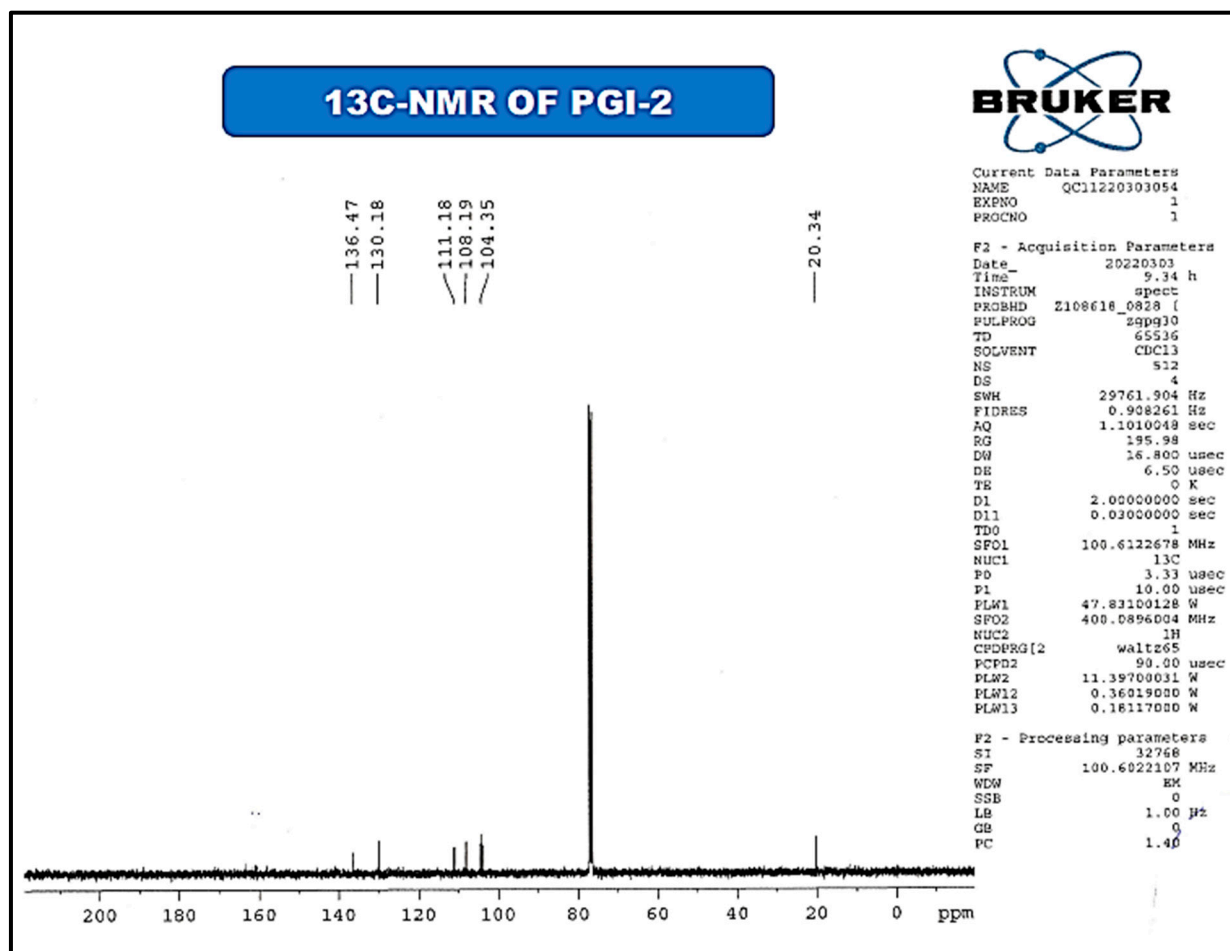

Figure S10: PGI-2 standard <sup>13</sup>C-NMR spectrum graph.

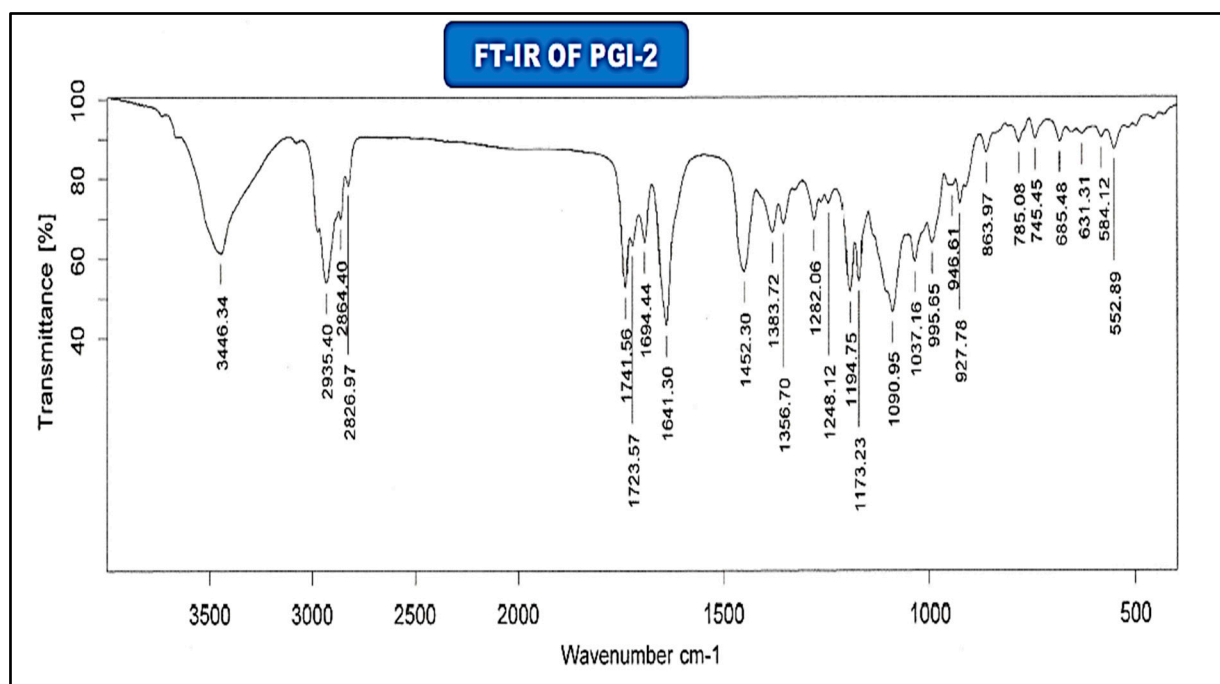

Figure S11: PGI-2 standard FT-IR spectrum.



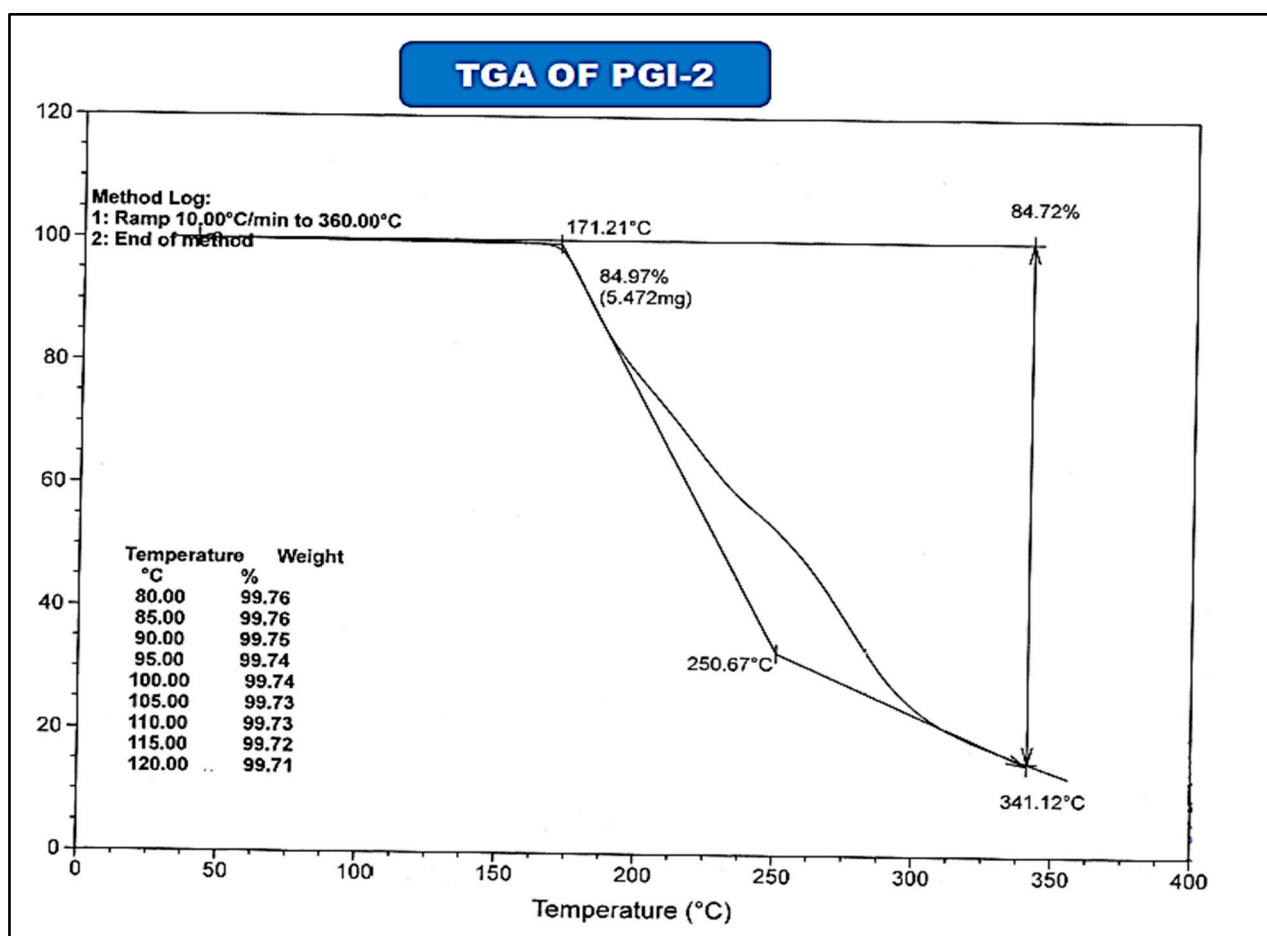

Figure S12: PGI-2 standard TGA graph.



# 1-bromo-2-(2,4- Difluoro phenyl) propan-2-ol (PGI-3) Standard Qualification Data

## CERTIFICATE OF ANALYSIS

| Name of Product: 1-bromo-2-(2,4-Difluorophenyl)propan-2-ol                                                                                                                                                                        |                                    |                                                                      |
|-----------------------------------------------------------------------------------------------------------------------------------------------------------------------------------------------------------------------------------|------------------------------------|----------------------------------------------------------------------|
| Molecular weight                                                                                                                                                                                                                  | : 251.07                           | Molecular Formula : C <sub>9</sub> H <sub>9</sub> BrF <sub>2</sub> O |
| 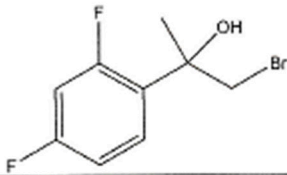                                                                                                                                                 |                                    |                                                                      |
| ChemicalName: 1-bromo-2-(2,4-difluorophenyl)propan-2-ol                                                                                                                                                                           |                                    |                                                                      |
| Sr. No.                                                                                                                                                                                                                           | Test                               | Result                                                               |
| 1                                                                                                                                                                                                                                 | Description                        | Colourless Liquid                                                    |
| 3                                                                                                                                                                                                                                 | Chromatographic Purity by HPLC     | 97.76%                                                               |
| 4                                                                                                                                                                                                                                 | MASS by LCMS                       | No Ionization                                                        |
| 5                                                                                                                                                                                                                                 | <sup>1</sup> H NMR                 | Confirms to structure                                                |
| 6                                                                                                                                                                                                                                 | <sup>13</sup> C NMR                | Confirms to structure                                                |
| 7                                                                                                                                                                                                                                 | FT-IR                              | Confirms to structure                                                |
| 8                                                                                                                                                                                                                                 | Loss on drying (LOD) by TGA (%W/W) | 0.15%                                                                |
| 9                                                                                                                                                                                                                                 | Potency (%W/W)                     | 97.61%                                                               |
| Conclusion: The product complies as per above specifications.                                                                                                                                                                     |                                    |                                                                      |
| <ul style="list-style-type: none"> <li>• Long term Storage Conditions: Store at 2 to 8° C</li> <li>• Transportation Storage Condition : Room temperature</li> <li>• Short Term storage condition : Ambient Temperature</li> </ul> |                                    |                                                                      |

**Figure S13:** 1-bromo-2-(2,4- Difluoro phenyl) propan-2-ol (PGI-3) standard certificate of analysis.

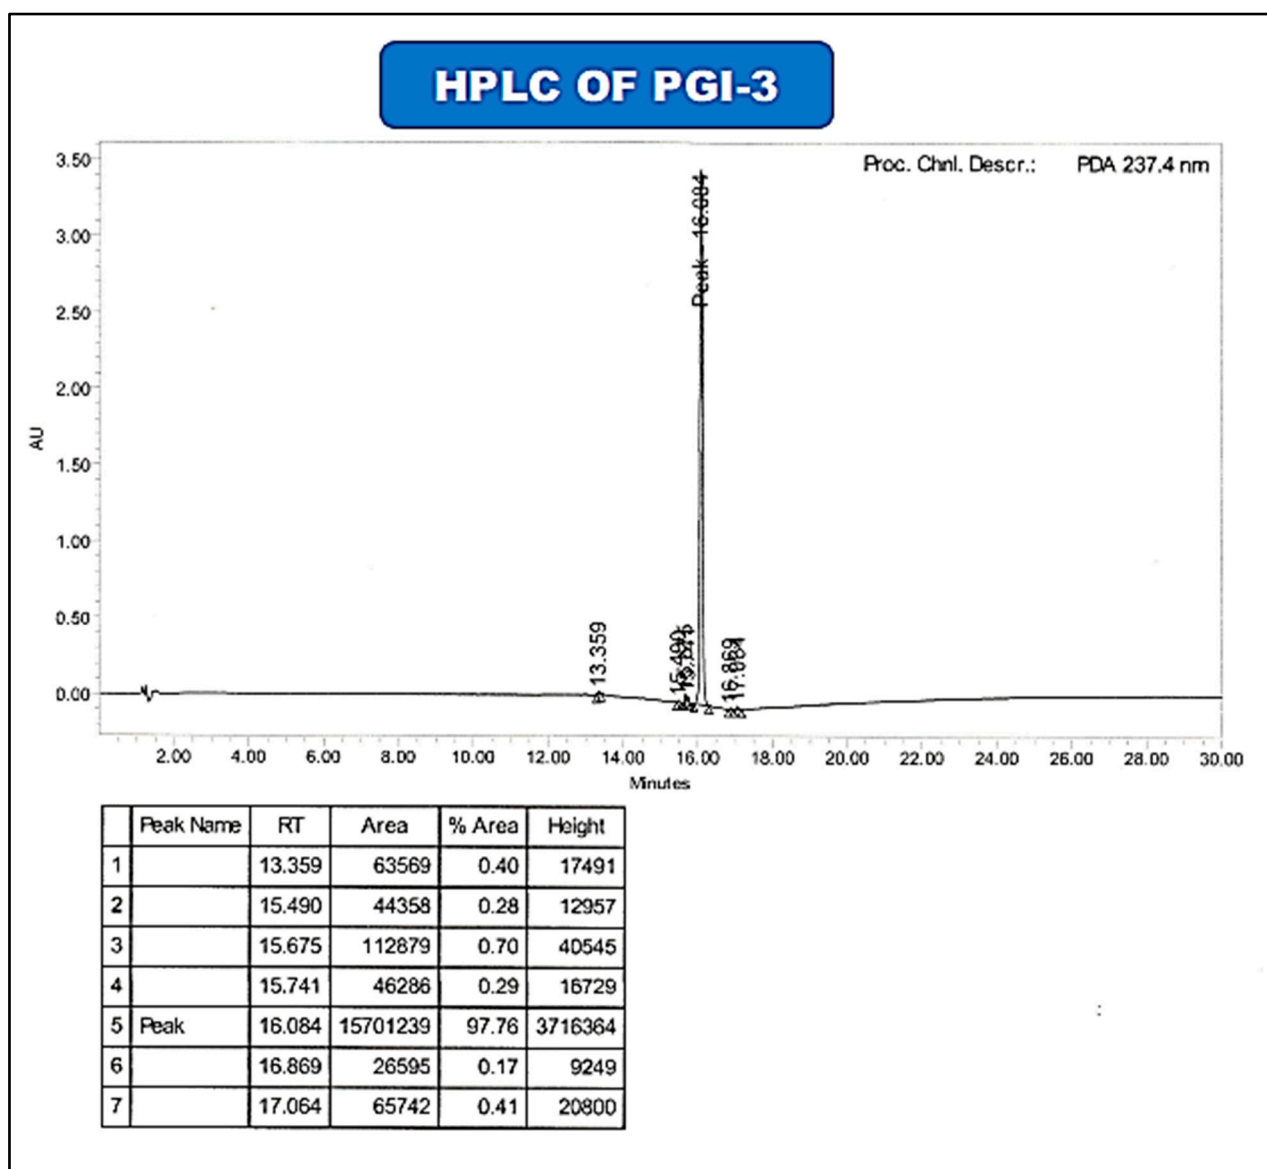

Figure S14: PGI-3 standard Purity by HPLC chromatogram.

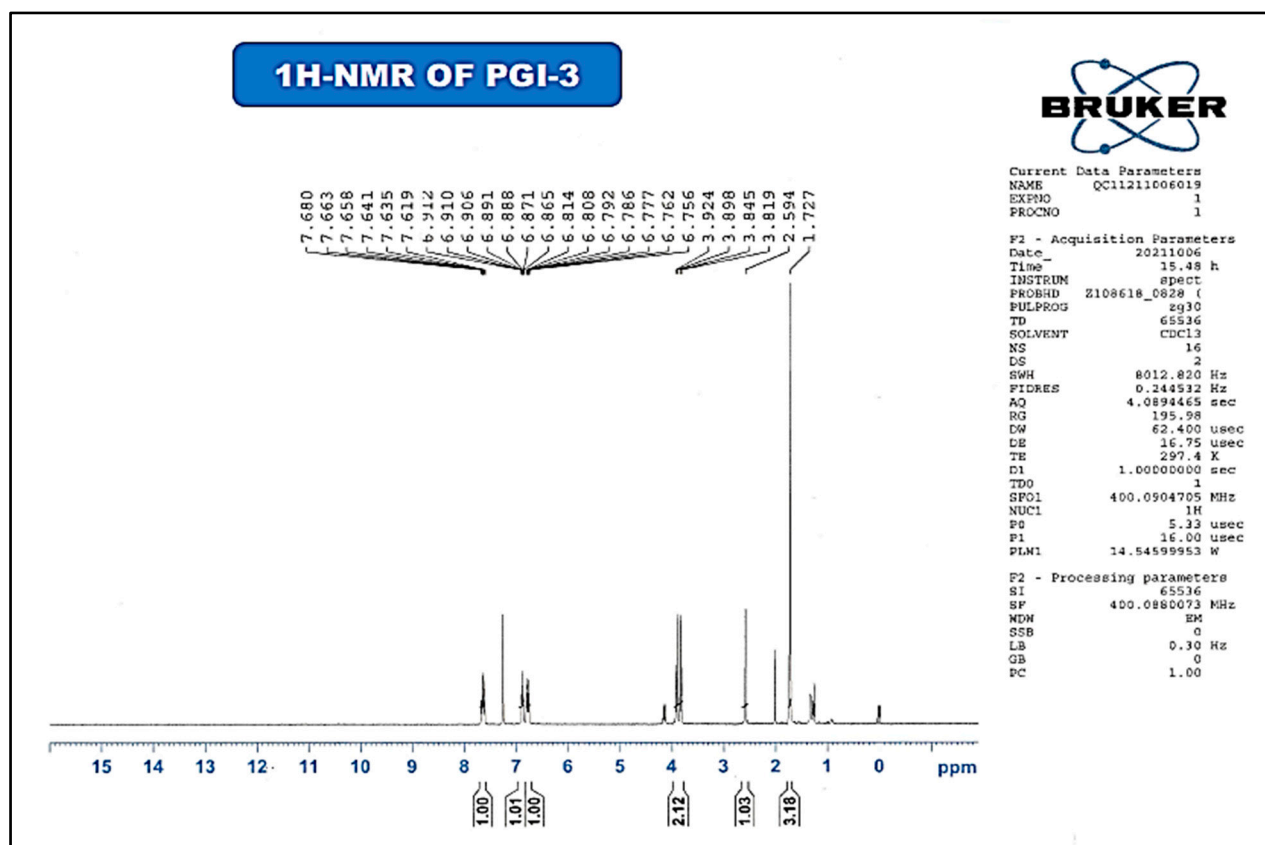

Figure S15: PGI-3 standard <sup>1</sup>H-NMR spectrum.

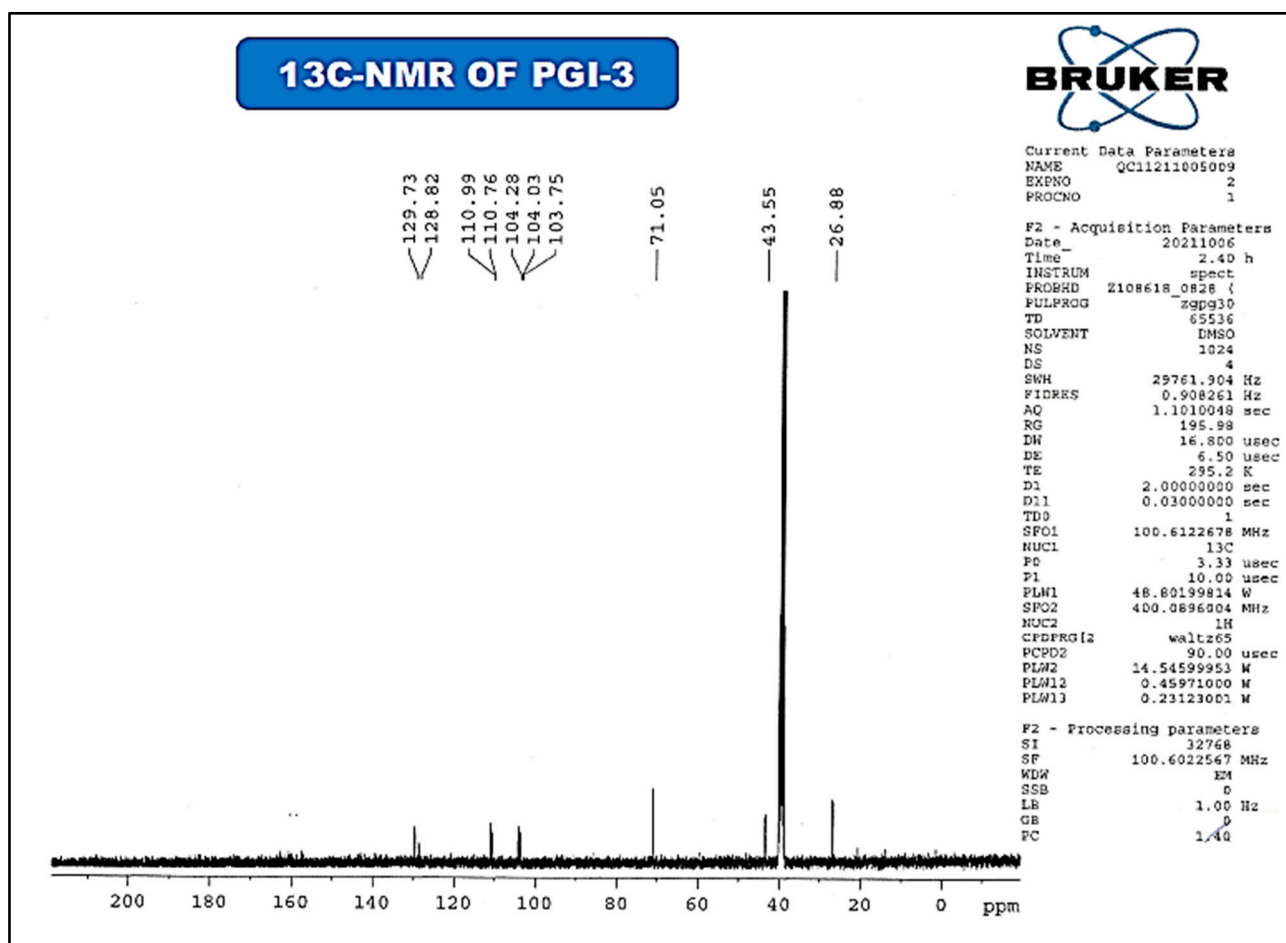

Figure S16: PGI-3 standard <sup>13</sup>C-NMR spectrum.

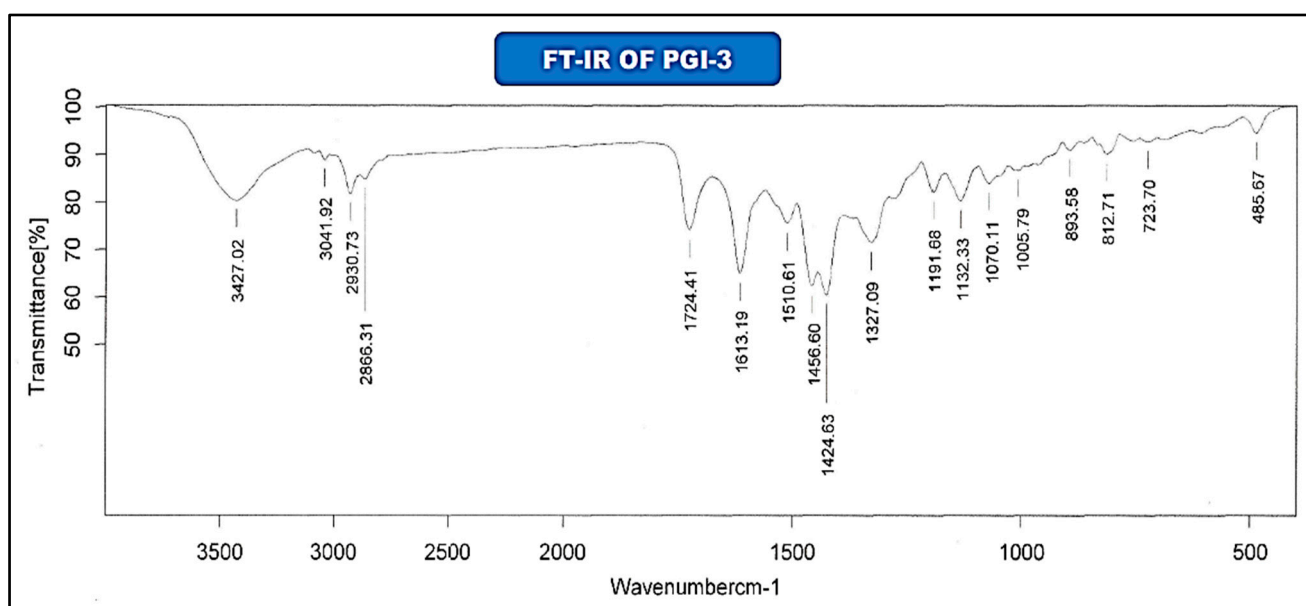

Figure S17: PGI-3 standard FT-IR spectrum.

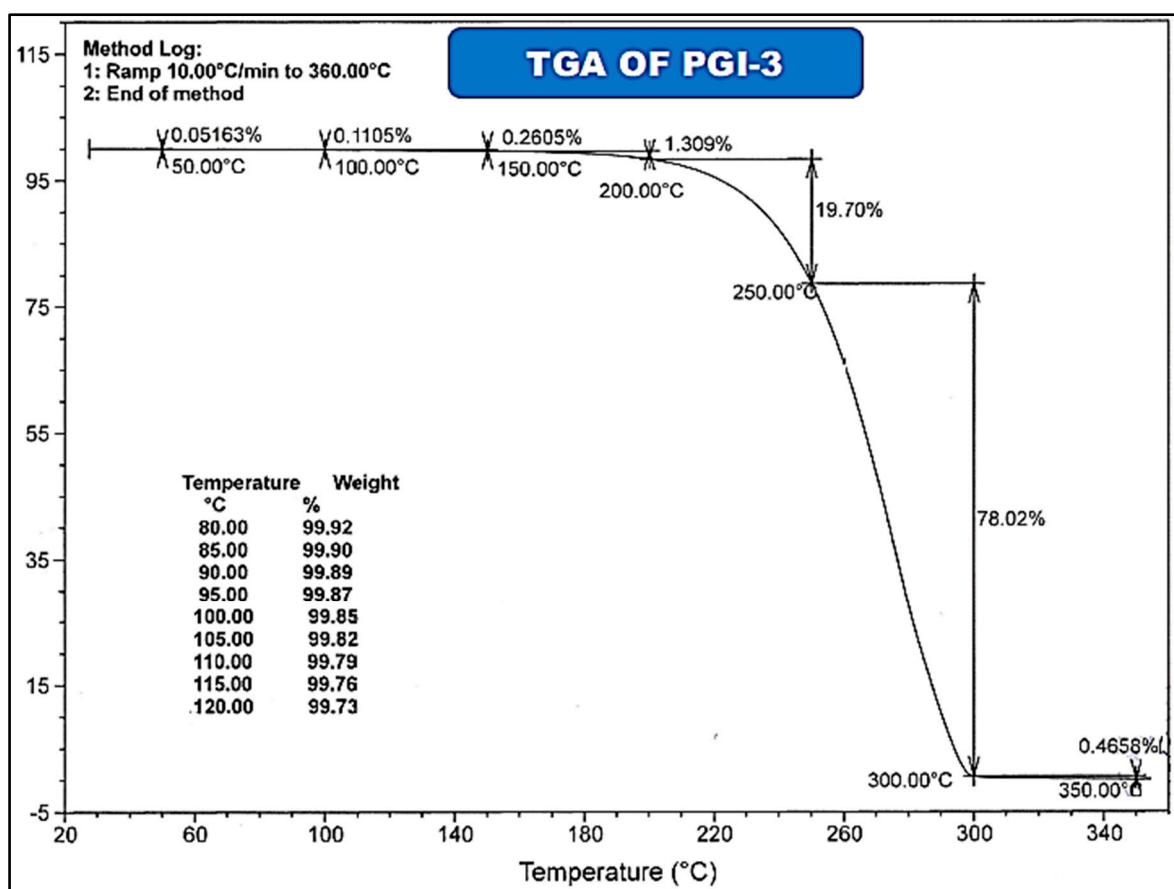

Figure S18: PGI-3 standard TGA graph.

## Method Validation Chromatograms

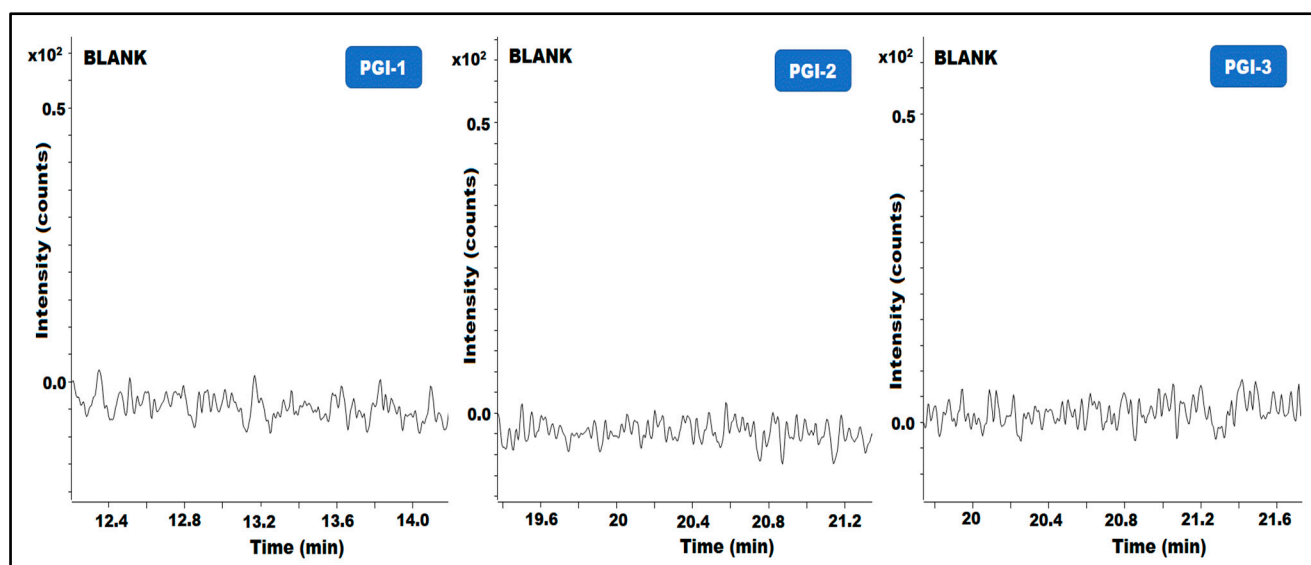

Figure S19: Blank solution chromatogram.

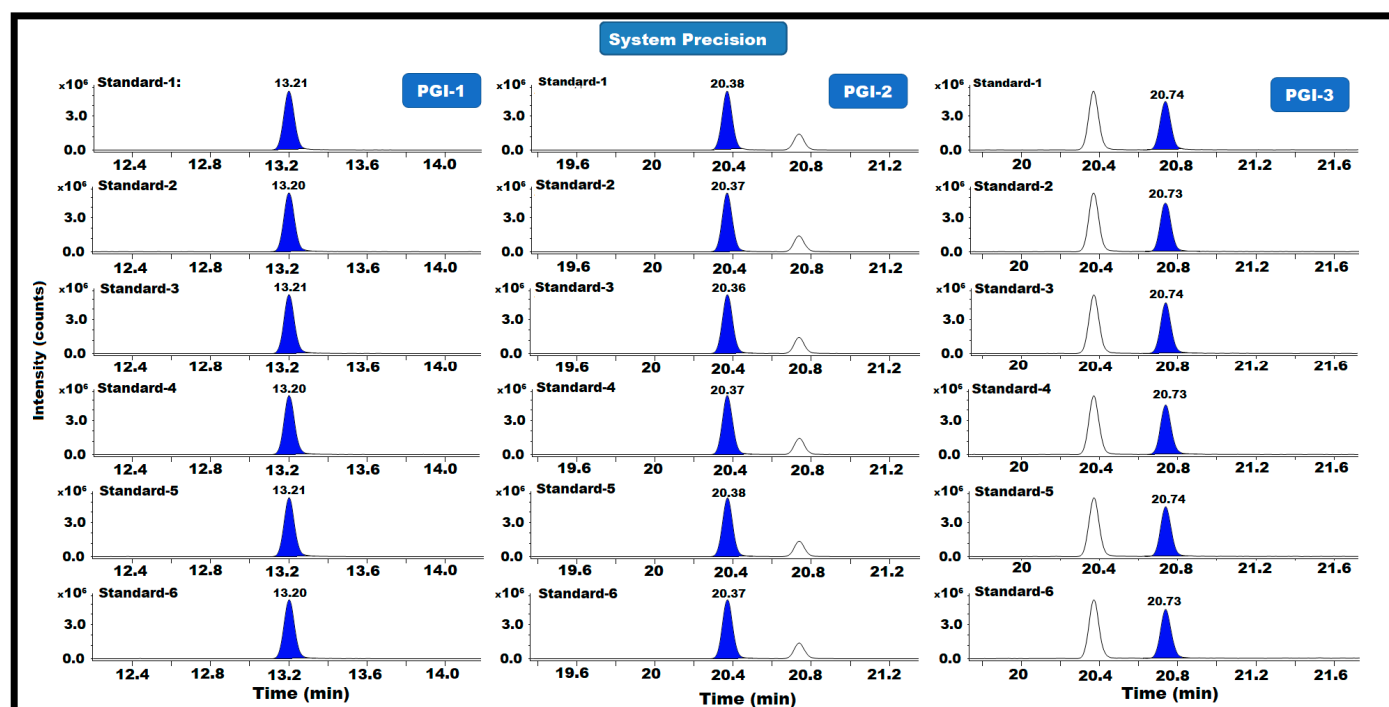

Figure S20: Standard solution chromatogram.

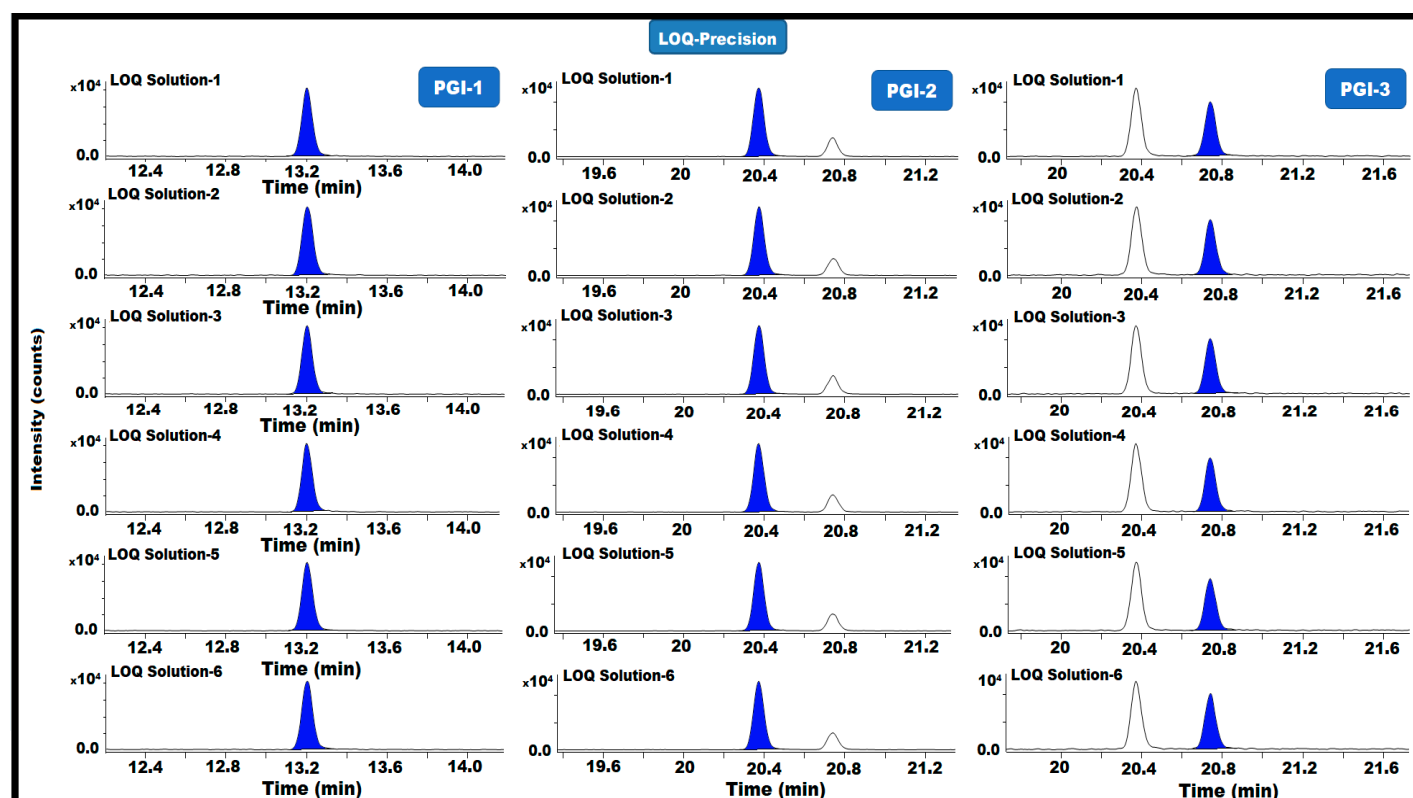

Figure S21: LOQ Precision chromatogram.

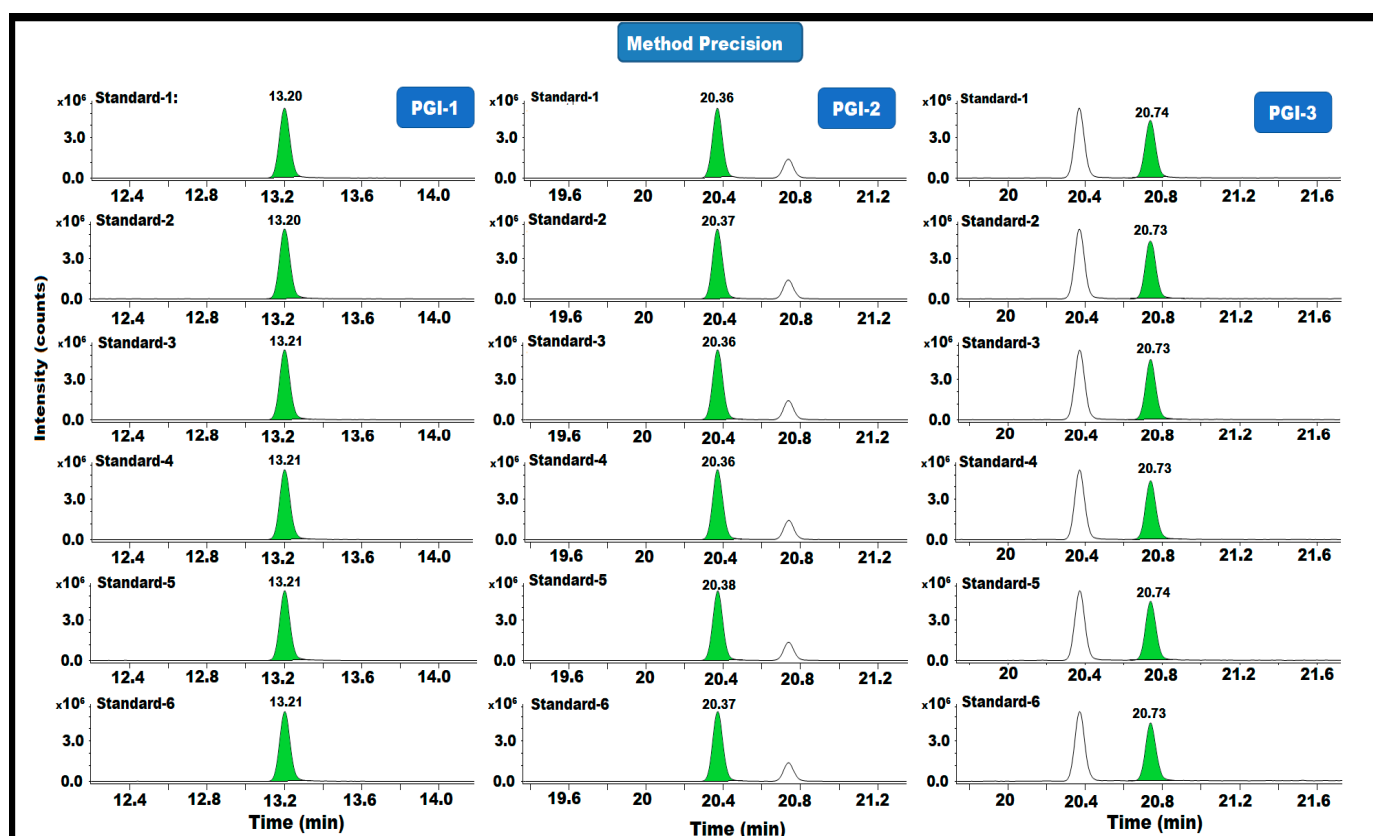

Figure S22: Method precision chromatogram.

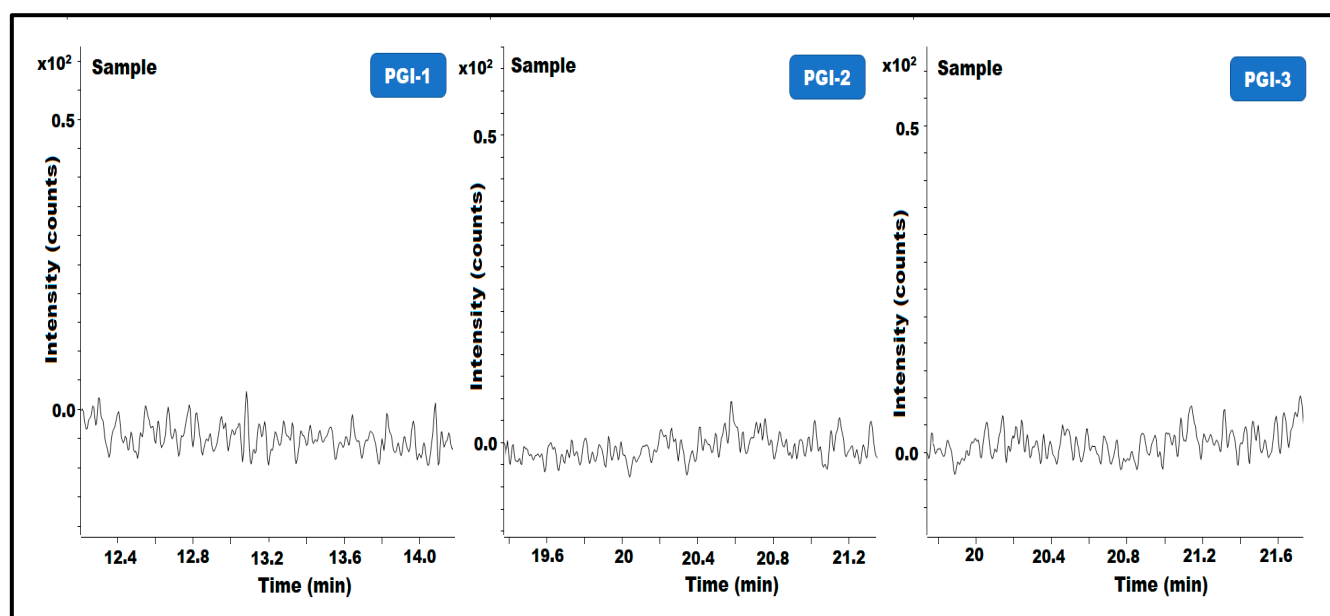

Figure S23: Sample solution chromatogram.



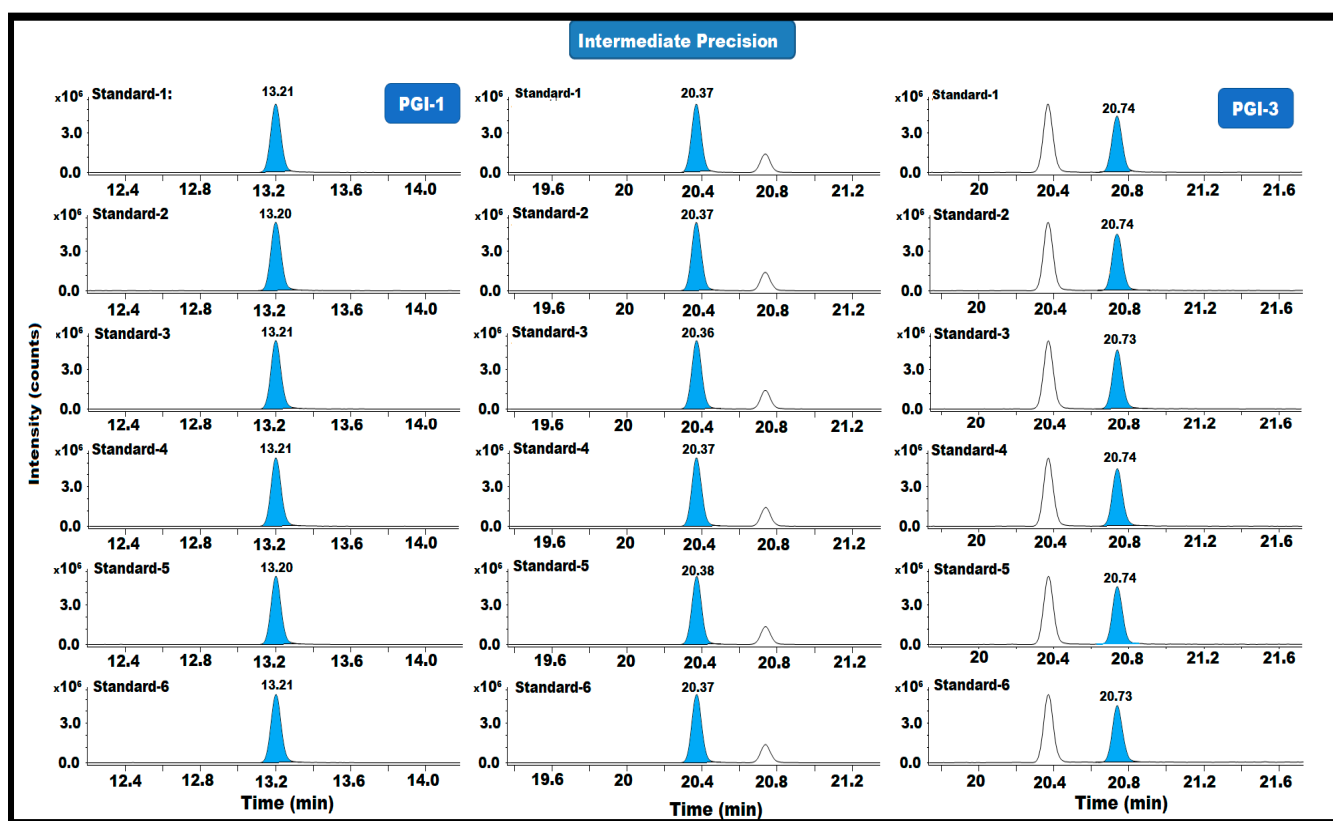

Figure S24: Intermediate precision chromatogram.

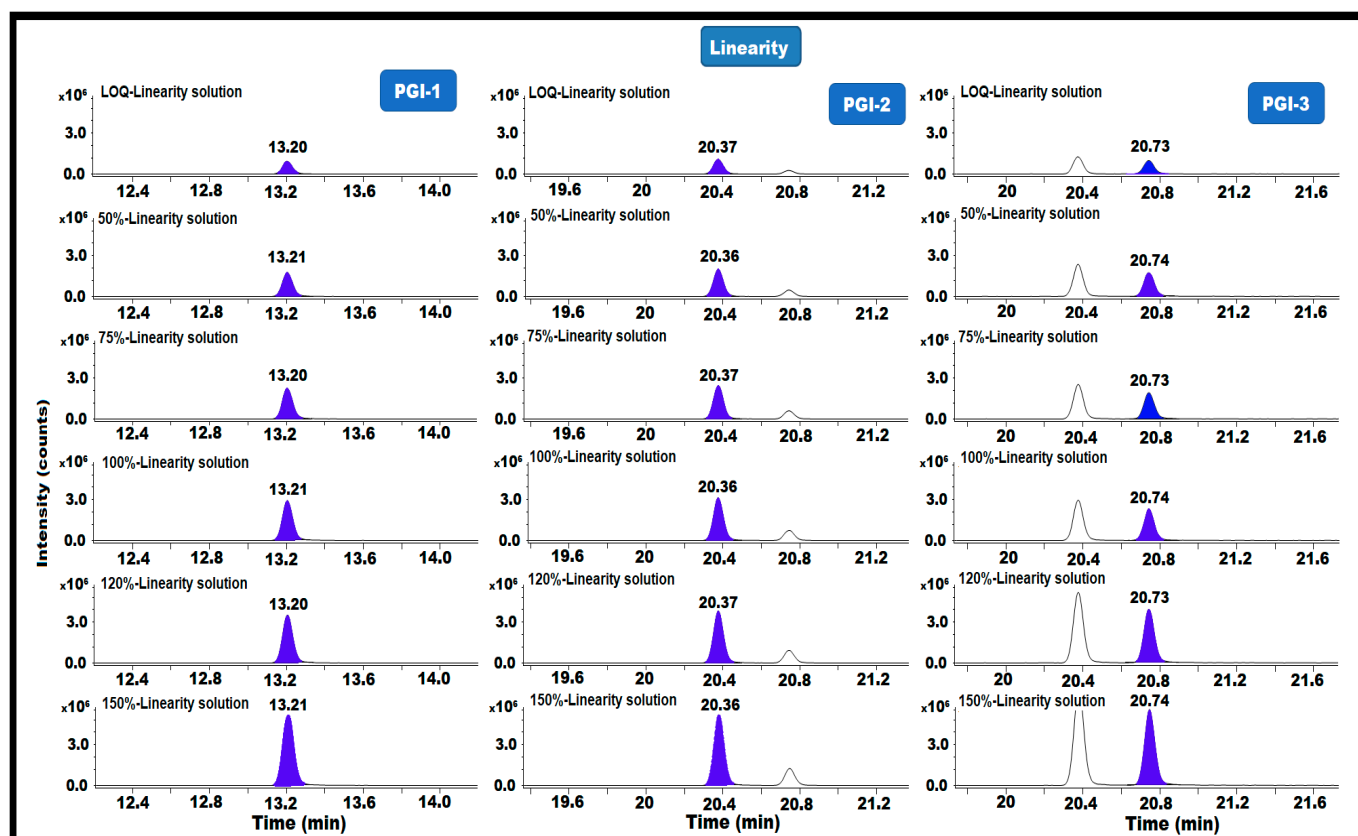

Figure S25: Linearity chromatogram.

| Method Development Experiments by Using HPLC-PDA and LC-MRM-MS/MS                                                                                                                                                                                                                                                                                                                                                                                                                                                                                                                                                                                                                                                                                                                                                                                     |                                                                                                                                                                                                                                                                                                                                                                                                                                |
|-------------------------------------------------------------------------------------------------------------------------------------------------------------------------------------------------------------------------------------------------------------------------------------------------------------------------------------------------------------------------------------------------------------------------------------------------------------------------------------------------------------------------------------------------------------------------------------------------------------------------------------------------------------------------------------------------------------------------------------------------------------------------------------------------------------------------------------------------------|--------------------------------------------------------------------------------------------------------------------------------------------------------------------------------------------------------------------------------------------------------------------------------------------------------------------------------------------------------------------------------------------------------------------------------|
| Analytical Technique                                                                                                                                                                                                                                                                                                                                                                                                                                                                                                                                                                                                                                                                                                                                                                                                                                  | Results                                                                                                                                                                                                                                                                                                                                                                                                                        |
| <p><b>HPLC-PDA :</b></p> <p>Liquid chromatography conditions:<br/>           Column: Symmetry C18 250mm x 4.6mm, 5 micron<br/>           Mobile phase A : 1 ml Formic acid in 1000ml water<br/>           Mobile phase B : Acetonitrile<br/>           Auto-sampler temperature 25 °C<br/>           Column temperature 30 °C<br/>           Flow rate: 1.0 mL/min<br/>           Injection volume: 100 µL<br/>           Gradient program (time/mobile phase B): 0/10, 20/80, 22/10, 30/10<br/>           Run time: 30 min<br/>           Note : Other conditions including different salt buffers, at different PH, column and organic solents used during the method development.</p>                                                                                                                                                              | <p>PGI-1,PGI-2 and PGI-2 peaks were detected at more than 100ppm concentration standard solution.</p> <p>However, the limit of targetted impurities was 0.1 ppm. Hence this technique found to be not suitable for the determination of these three Alkyl halide impurities (PGI-1,PGI-2 and PGI-3) in posocanozole</p>                                                                                                        |
| <p><b>LC-MRM-MS:</b></p> <p>Column: Zorbax SB C18 100mm x 4.6mm, 3.5 micron<br/>           Mobile phase A : 1 ml Formic acid in 1000ml water<br/>           Mobile phase B : 1 ml Formic acid in 1000ml Methanol<br/>           Auto-sampler temperature 25 °C<br/>           Column temperature 30 °C<br/>           Flow rate: 0.6 mL/min<br/>           Injection volume: 50 µL<br/>           Gradient program (time/mobile phase B): 0/10, 10/90, 15/90, 17/10, 22/10<br/>           Run time: 22 min<br/>           Mass spectrometry conditions:<br/>           Source and Ionization mode: ESI- Positive<br/>           Detection mode: MRM<br/>           MS temperature: 400°C<br/>           Note : Other conditions including different salt buffers, at different PH, column and organic solents used during the method development.</p> | <p>The response of PGI-1,PGI-2 and PGI-2 peaks was very poor and observed that the response for injection to injection dropped down drastically.</p> <p>However, the limit of targetted impurities was 0.1 ppm, and LOD and LOQ should be established lower than this. Hence, this technique found to be not suitable for the determination of these three alkyl halide impurities (PGI-1,PGI-2 and PGI-3) in posocanozole</p> |

**Figure S26:** Method development experiments result.

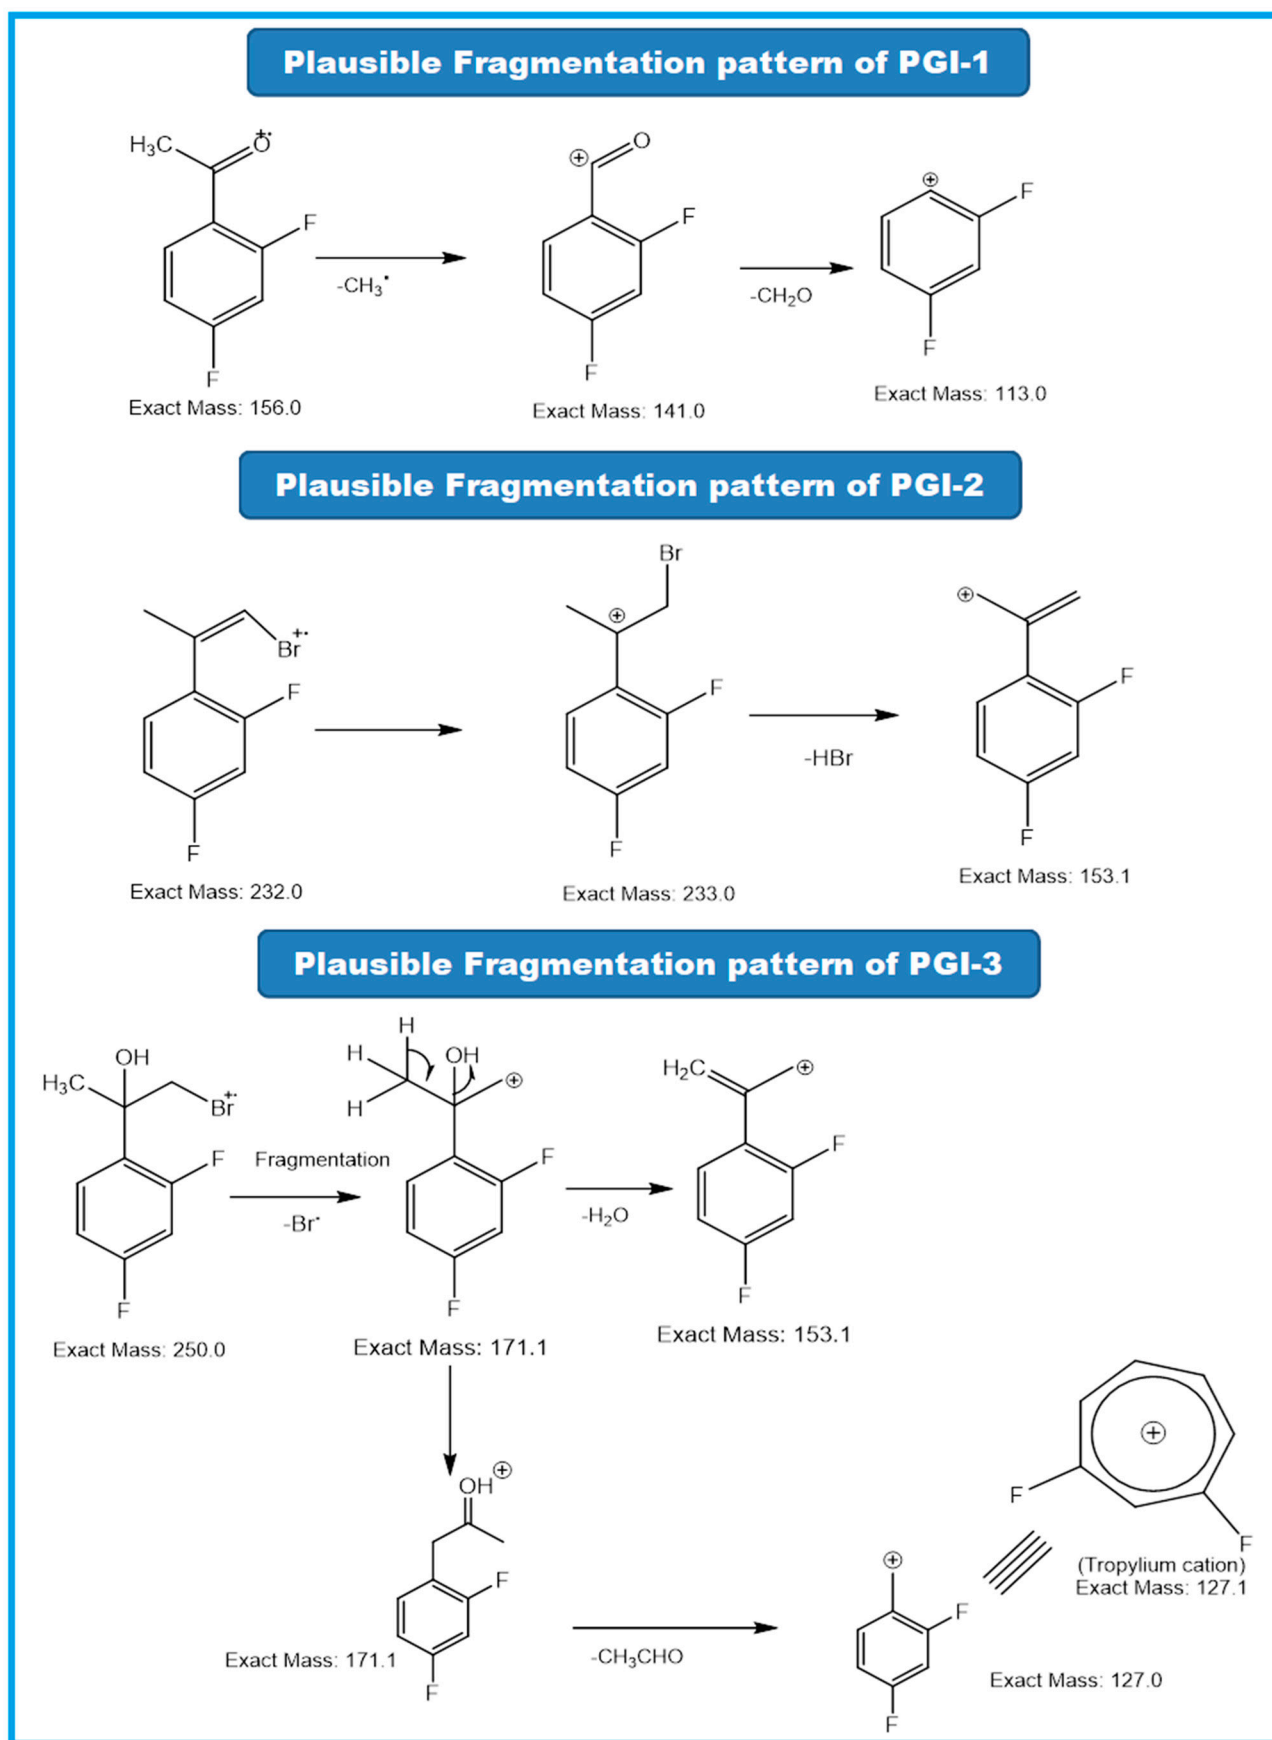

**Figure S27:** Plausible Fragmentation pattern of PGI-1, PGI-2 and PGI-3 impurities.
